# Supplementary material
Source: publisher figshare collection journal article supplement (https://karger.figshare.com/articles/dataset/_/7000751)
Supplement: Supplementary file 1 [file 1]

## SUPPLEMENTARY MATERIAL

# **Targeting Peroxisome Proliferator Activated Receptor $\alpha$ (PPAR $\alpha$ ) For the Prevention of Mitochondrial Impairment and Hypertrophy in Cardiomyocytes**

Dipak Kar   Arun Bandyopadhyay

Cell Biology and Physiology Division, CSIR - Indian Institute of Chemical Biology, Kolkata, India

Supplementary Material Nr.1: Movie 1  
Supplementary Material Nr. 2: Movie 2  
Supplementary Material Nr. 3: Movie 3  
Supplementary Material Nr. 4: Movie 4  
Supplementary Material Nr. 5: Movie 5  
Supplementary Material Nr. 6: Movie 6  
Supplementary Material Nr. 7: Movie 7  
Supplementary Material Nr. 8: Movie 8
